# Supplementary material for: Isolation of nitrate-reducing bacteria from an offshore reservoir and the associated biosurfactant production
Source: Royal Society of Chemistry journal article supplement (doi:10.1039/c8ra03377c), 2018-01-01
Supplement: c8ra03377c1.pdf [file c8ra03377c1.pdf]

## Supplementary Material

### Isolation of nitrate-reducing bacteria from an offshore reservoir and the associated biosurfactant production

Fuqiang Fan<sup>1</sup>, Baiyu Zhang<sup>1\*</sup>, Penny L. Morrill<sup>2</sup>, Tahir Husain<sup>1</sup>

\*Corresponding author: Baiyu Zhang: [bzhang@mun.ca](mailto:bzhang@mun.ca)

#### Supplementary Figures

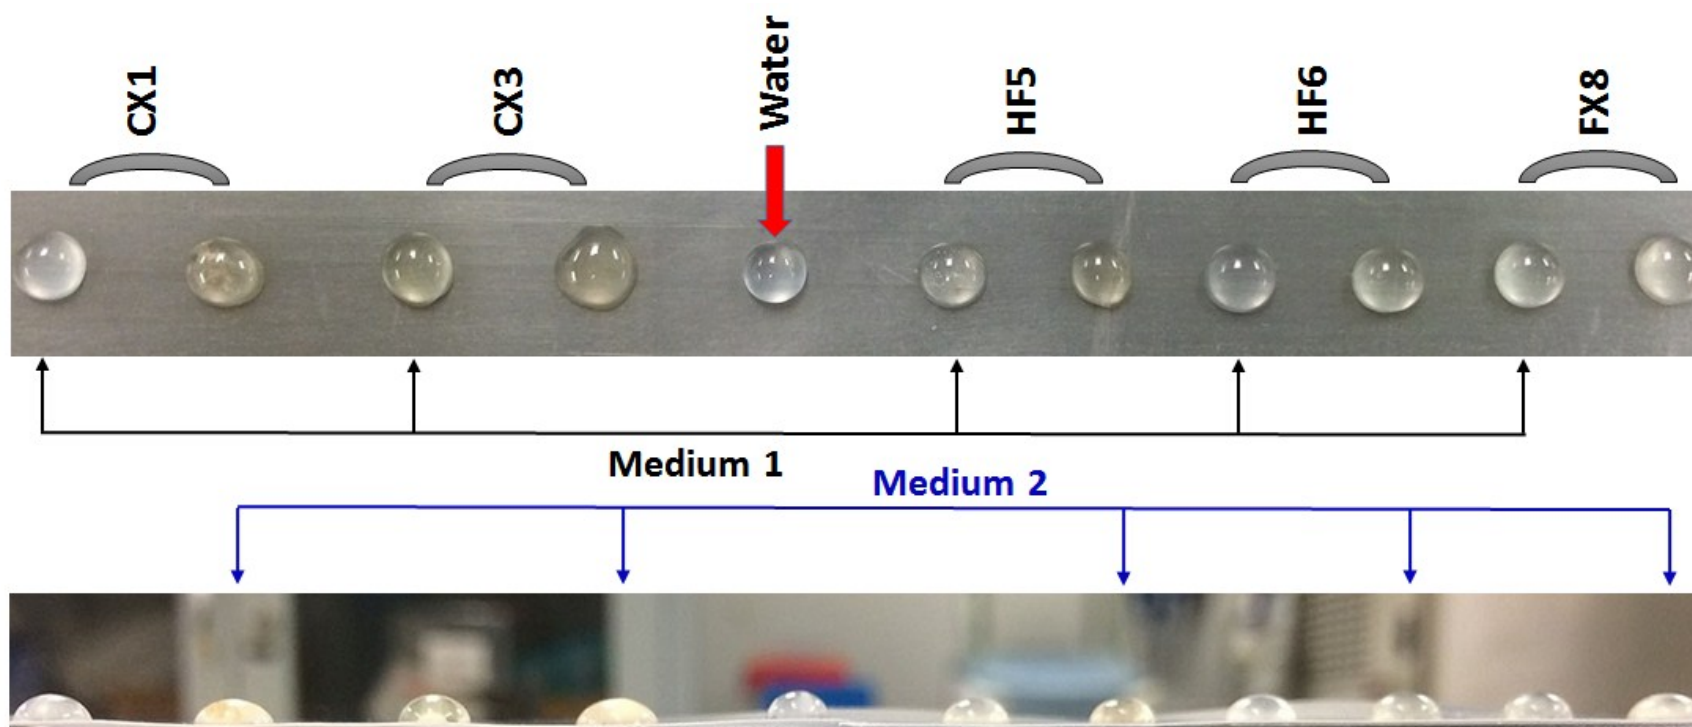

**Figure S1** Secretion of amphipathic biosurfactant reduces the surface tension of the culture supernatant as indicated by the degree of flatness of droplet on parafilm.
